# Supplementary material for: Tumour infiltrating lymphocytes and immune-related genes as predictors of outcome in pancreatic adenocarcinoma
Source: PubMed Central journal article supplement (PMC6681957; doi:10.1371/journal.pone.0219566), 2019-08-05
Supplement: pone.0219566.s004.pdf [file pone.0219566.s004.pdf]

| ID          | date diagnosis | date of metastasis | DFS (months) | exitus | date of death | OS (months) |
|-------------|----------------|--------------------|--------------|--------|---------------|-------------|
| Worse cases | 18/09/2013     | 21/11/2013         | 2            | yes    | 07/01/2014    | 4           |
|             | 08/11/2013     | 20/01/2014         | 2            | yes    | 10/08/2014    | 9           |
|             | 16/01/2014     | 20/02/2014         | 1            | no     |               |             |
|             | 16/02/2015     | 08/04/2015         | 2            | yes    | 25/07/2015    | 5           |
|             | 22/06/2015     | 27/08/2015         | 2            | yes    | 25/09/2015    | 3           |
|             | 26/10/2015     | 06/11/2015         | 1            | no     |               |             |
| Good cases  | 05/03/2008     | 01/12/2011         | 45           | yes    | 07/03/2012    | 48          |
|             | 19/05/2009     | 01/10/2010         | 17           | yes    | 05/09/2012    | 40          |
|             | 22/09/2009     | 01/04/2014         | 55           | yes    | 17/03/2015    | 66          |
|             | 20/10/2011     | 28/05/2012         | 7            | yes    | 29/09/2014    | 35          |
|             | 21/02/2013     | 29/10/2013         | 8            | yes    | 07/03/2015    | 25          |
|             | 27/01/2009     | 29/09/2013         | 56           | yes    | 03/07/2014    | 66          |
